# Supplementary material for: Ultrafine cable-like WC/W2C heterojunction nanowires covered by graphitic carbon towards highly efficient electrocatalytic hydrogen evolution
Source: Royal Society of Chemistry journal article supplement (doi:10.1039/c8ta05007d), 2018-01-01
Supplement: c8ta05007d1.pdf [file c8ta05007d1.pdf]

## Supporting Information

### Ultrafine Cable-like WC/W<sub>2</sub>C Heterojunction Nanowires Covered by Graphitic Carbon towards High Efficient Electrocatalytic Hydrogen Evolution

Lu-Nan Zhang,<sup>a</sup> Yuan-Yuan Ma,<sup>a</sup> Zhong-Ling Lang,<sup>a\*</sup> Yong-Hui Wang,<sup>a</sup> Shifa Ullah Khan,<sup>a</sup> Gang Yan,<sup>a</sup> Hua-Qiao Tan,<sup>a\*</sup> Hong-Ying Zang,<sup>a</sup> Yang-guang Li<sup>a\*</sup>

<sup>a</sup> Key Laboratory of Polyoxometalate Science of Ministry of Education, Faculty of Chemistry, Northeast Normal University, Changchun, 130024 (P.R. China)

\*Corresponding authors

E-mail address: langzl554@nenu.edu.cn (Z.L. Lang), tanhq870@nenu.edu.cn. (H.Q. Tan), liyg658@nenu.edu.cn. (Y.G. Li).

Postal address: Northeast Normal University, Renmin Street No. 5268, Changchun, Jilin Province, 130024, P. R. China

#### Table of contents

| Section                                                | Page |
|--------------------------------------------------------|------|
| Experimental Section                                   | S4   |
| Theoretical Section                                    | S6   |
| Supporting Figures                                     | S21  |
| Supporting Tables                                      | S27  |
| The detailed HER mechanism in heterojunction catalysts | S28  |
| References                                             | S30  |

## **Experimental Section**

### **Preparation of the working electrodes**

The working electrode was prepared as follows: 2 mg of catalyst was dispersed in 500  $\mu\text{l}$  of 0.5 wt% Nafion solution. After ultrasonication for 1 h, 6  $\mu\text{l}$  of the homogeneous ink was dropped on the surface of a glassy carbon electrode (GCE) with a diameter of 3 mm. The loading of catalyst is about  $0.34 \text{ mg cm}^{-2}$ . The electrode was then dried in air.

### **Preparation of electrolytes**

0.5 M  $\text{H}_2\text{SO}_4$  (pH=0.30), 0.05 M  $\text{H}_2\text{SO}_4$  + 0.45 M  $\text{Na}_2\text{SO}_4$  (pH=1.54), 5 mM  $\text{H}_2\text{SO}_4$  + 0.49 M  $\text{Na}_2\text{SO}_4$  (pH=2.73), 0.5 mM  $\text{H}_2\text{SO}_4$  + 0.49 M  $\text{Na}_2\text{SO}_4$  (pH=3.65), 0.05 mM  $\text{H}_2\text{SO}_4$  + 0.49 M  $\text{Na}_2\text{SO}_4$  (pH=4.63), 5  $\mu\text{M}$   $\text{H}_2\text{SO}_4$  + 0.49 M  $\text{Na}_2\text{SO}_4$  (pH=5.65), 0.5  $\mu\text{M}$   $\text{H}_2\text{SO}_4$  + 0.49 M  $\text{Na}_2\text{SO}_4$  (pH=5.80), 1 M KOH (pH=14.00), 0.1 M KOH + 0.6 M  $\text{K}_2\text{SO}_4$  (pH=12.80), 0.01 M KOH + 0.66 M  $\text{K}_2\text{SO}_4$  (pH=12.02), 1 mM KOH + 0.66 M  $\text{K}_2\text{SO}_4$  (pH=11.33), 0.1 mM KOH + 0.66 M  $\text{K}_2\text{SO}_4$  (pH=9.46), 0.01 mM KOH + 0.66 M  $\text{K}_2\text{SO}_4$  (pH=9.33), 1  $\mu\text{M}$  KOH + 0.66 M  $\text{K}_2\text{SO}_4$  (pH=8.19).

1 M PBS was prepared by dissolving 1.361 g  $\text{KH}_2\text{PO}_4$  in 10 mL deionized water, and the pH of the mixture was adjusted to 7.00 with 1 M KOH.

### **Physical characterization**

The electron transmission microscopy (TEM) was performed on a JEOL-2100F transmission electron microscope. The powder X-ray diffraction (PXRD) measurements were carried out on a Rigaku D/max-IIB X-ray diffractometer with  $\text{Cu-K}\alpha$  radiation ( $\lambda=1.5418\text{\AA}$ ). Raman spectrum was recorded on a Raman

spectrometer (JY, Labram HR 800). The X-ray photoelectron spectroscopy (XPS) measurements were performed on an ESCALAB 250 spectrometer (Thermo Electron Corp.) with Al K $\alpha$  radiation ( $h\nu=1486.6$  eV) as the excitation source. The interrelated energy dispersive X-ray detector (EDX) spectra were achieved by using a SU8000 ESEM FEG microscope. The nitrogen sorption measurement was obtained on an ASAP 2020 (Micromeritics, USA).

### **Electrochemical measurements**

All the cyclic voltammetry (CV) and linear sweep voltammetry (LSV) measurements were performed with a typical three-electrode system using a CHI660E electrochemical workstation (CH Instruments, China) at 25 °C. A modified glassy carbon electrode (GCE,  $d=3$  mm) was served as the working electrode. A carbon rod was used as the counter electrode, and a saturated calomel electrode (SCE) as the reference electrode. For comparison, the bare glassy carbon electrode (GCE) and commercial Pt/C catalyst (20 wt% Pt/XC-72R) are also evaluated as reference samples. In all measurements, the potential measured against an SCE electrode were calibrated to the potentials referenced to the reversible hydrogen electrode (RHE), according to  $E_{\text{RHE}}=E_{\text{SCE}}+E^{\circ}_{\text{SCE}}+0.059 \text{ pH}$ . All the electrolytes were N<sub>2</sub> saturated before the measurements. The linear sweep voltammetry (LSV) measurements were carried out with a scan rate of 5mv s<sup>-1</sup>. Tafel slopes were determined by fitting the linear regions of Tafel plots according to the Tafel equation ( $\eta=b \log j + a$ ). Electrochemical stability was measured using cyclic voltammetric sweeps at 100 mV s<sup>-1</sup> between - 0.2 V and - 0.4 V (vs. SCE). To evaluate electrochemically active surface

area (ECSA), the scan rate of cyclic voltammograms was set to 25, 50, 75, 100, 125, 150, 175, and 200  $\text{mV s}^{-1}$ . The range of voltage was from -0.1 to 0.1 V (vs. SCE, in 0.5 M  $\text{H}_2\text{SO}_4$ ) and -1.1 to -0.9 V (vs. SCE, in 1 M KOH), respectively. The long-term (45 hrs) stability was also tested at controlled overpotential. Electrochemical impedance spectroscopy (EIS) was performed on a PARSTAT 2273 electrochemical configuration (Princeton Applied Research Instrumentation, USA) with frequency from 0.01 to 100000 Hz and an amplitude of 10 mV. The EIS spectra were fitted by the Z-SimpWin software. All the electrochemistry measurements are represented with IR compensation.

## **Theoretical Section**

### **Computational methods**

Theoretical modeling based on periodic density functional theory (DFT) method were carried out with *Vienna ab initio simulation package* (VASP 5.3 version) to evaluate the adsorption ability of  $\text{H}^{\text{S1-S4}}$ . For the description of electron exchange-correlation, the Perdew–Burke-Ernzerhof (PBE) functional within the generalized-gradient approximation range was applied<sup>S5</sup>. The valence electrons were considered as following for per species,  $5\text{d}^46\text{s}^2$  for W,  $2\text{s}^2\text{sp}^2$  for C, and  $1\text{s}^1$  for H. The interaction between these valence electrons and the corresponding pseudopotential was described using the projector augmented wave (PAW) scheme<sup>S6</sup>. The kinetic energy cutoff was chosen to be 400 eV. Geometric optimizations for all models were performed until self-consistency, with thresholds of  $1 \times 10^{-5}$  eV and  $0.03 \text{ eV/\AA}$  for electronic and ionic convergence, respectively. The K-point mesh for all models was set to be  $3 \times 3 \times 1$

with Monkhorst-Pack automatic grid<sup>S7</sup>.

The Gibbs free energy for hydrogen adsorption was defined as:

$$\Delta G = \Delta E + \Delta E_{\text{ZPE}} - T\Delta S$$

Where  $\Delta E$  is the adsorption energies of H on the surface ( $\Delta E = E_{\text{total}} - E_{\text{slab}} - 1/2E_{\text{H}_2}$ ),  $\Delta E_{\text{ZPE}}$  is the zero-point energy difference between the adsorbed state of the system and the gas phase state for H by referring the equation of  $\Delta E_{\text{ZPE}} = E_{\text{ZPE}(\text{H}^*)} - 1/2E_{\text{ZPE}(\text{H}_2)}$ . In the current case, the  $E_{\text{ZPE}(\text{H}_2)}$  is calculated to be 0.278 eV. Similarly,  $\Delta S$  is the entropy difference between the adsorbed and gas phase H, it can be obtained from the equation  $\Delta S = S(\text{H}^*) - 1/2 S(\text{H}_2) \approx -1/2 S(\text{H}_2)$ , in which the vibrational entropy of  $\text{H}^*$  was negligible. Since  $TS(\text{H}_2)$  is known to be 0.41 eV for  $\text{H}_2$  at 300 K and 1 atm, so the corresponding  $T\Delta S$  is obtained as  $-0.205$  eV.

### Computational models

Bulk WC and  $\text{W}_2\text{C}$  both were adopted the hexagonal structure, and the lattice parameters ( $a = b = 3.057 \text{ \AA}$ ,  $c = 4.669 \text{ \AA}$  for  $\text{W}_2\text{C}$ ,  $a = b = 2.918 \text{ \AA}$ ,  $c = 2.845 \text{ \AA}$  for WC) were calculated in accordance with experimental values ( $a = b = 2.990 \text{ \AA}$ ,  $c = 4.720 \text{ \AA}$  for  $\text{W}_2\text{C}$ ,  $a = b = 2.906 \text{ \AA}$ ,  $c = 2.837$  for WC). Supplementary Figure S15 shows the theoretical models of the studied systems. The clean WC (001) and  $\text{W}_2\text{C}$  (001) surfaces were composed of three layers of carbides with vacuum space larger than  $15 \text{ \AA}$ . In both cases, the model surface consisted of a  $4 \times 4$  supercell in which the bottom two layers were fixed while the top layer was allowed to relax. The lattice constants of WC and  $\text{W}_2\text{C}$  are  $2.918$  ( $a=b$ ) and  $3.057 \text{ \AA}$ , respectively; thus, there is almost lattice match with error of only 4%. The composite  $\text{W}_2\text{C}/\text{WC}$  surfaces, one

layer of WC (001) carbide (or  $W_2C$  carbide) was constructed onto three  $W_2C$  (001) (WC) layers. In order to simulate the models with nanowire character, suspended WC (a  $W_8C_8$  cluster periodic in y direction) and  $W_2C$  (a  $W_{24}C_{12}$  cluster periodic in y direction) nanowires that periodic in the y direction was constructed on the  $W_2C$  (001) and WC (001) surface respectively.

### Supporting Figures

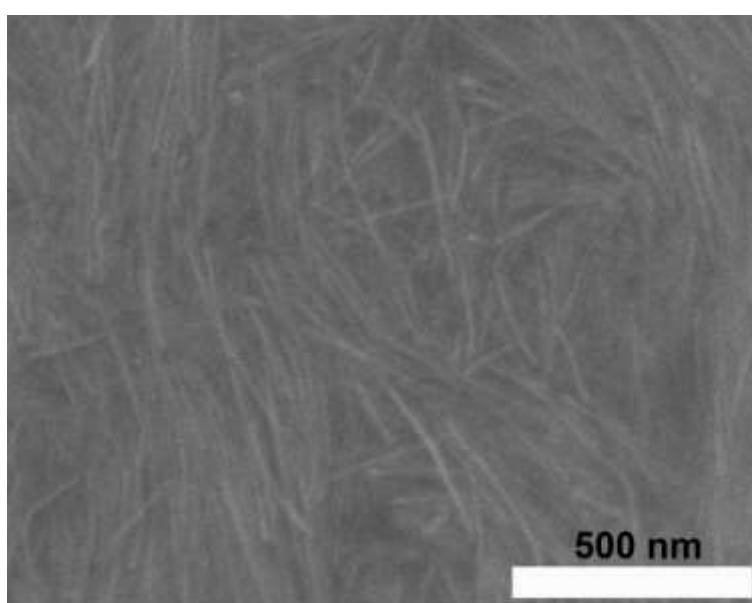

**Fig. S1** SEM image of precursor  $W_{18}O_{49}$  NWs.

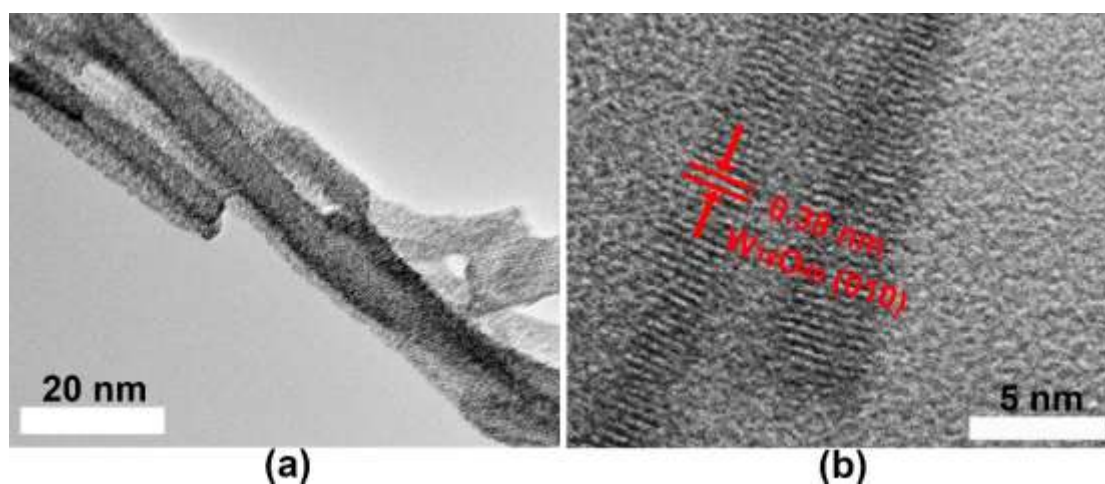

**Fig. S2** (a) TEM and (b) HRTEM images of precursor  $W_{18}O_{49}$  NWs.

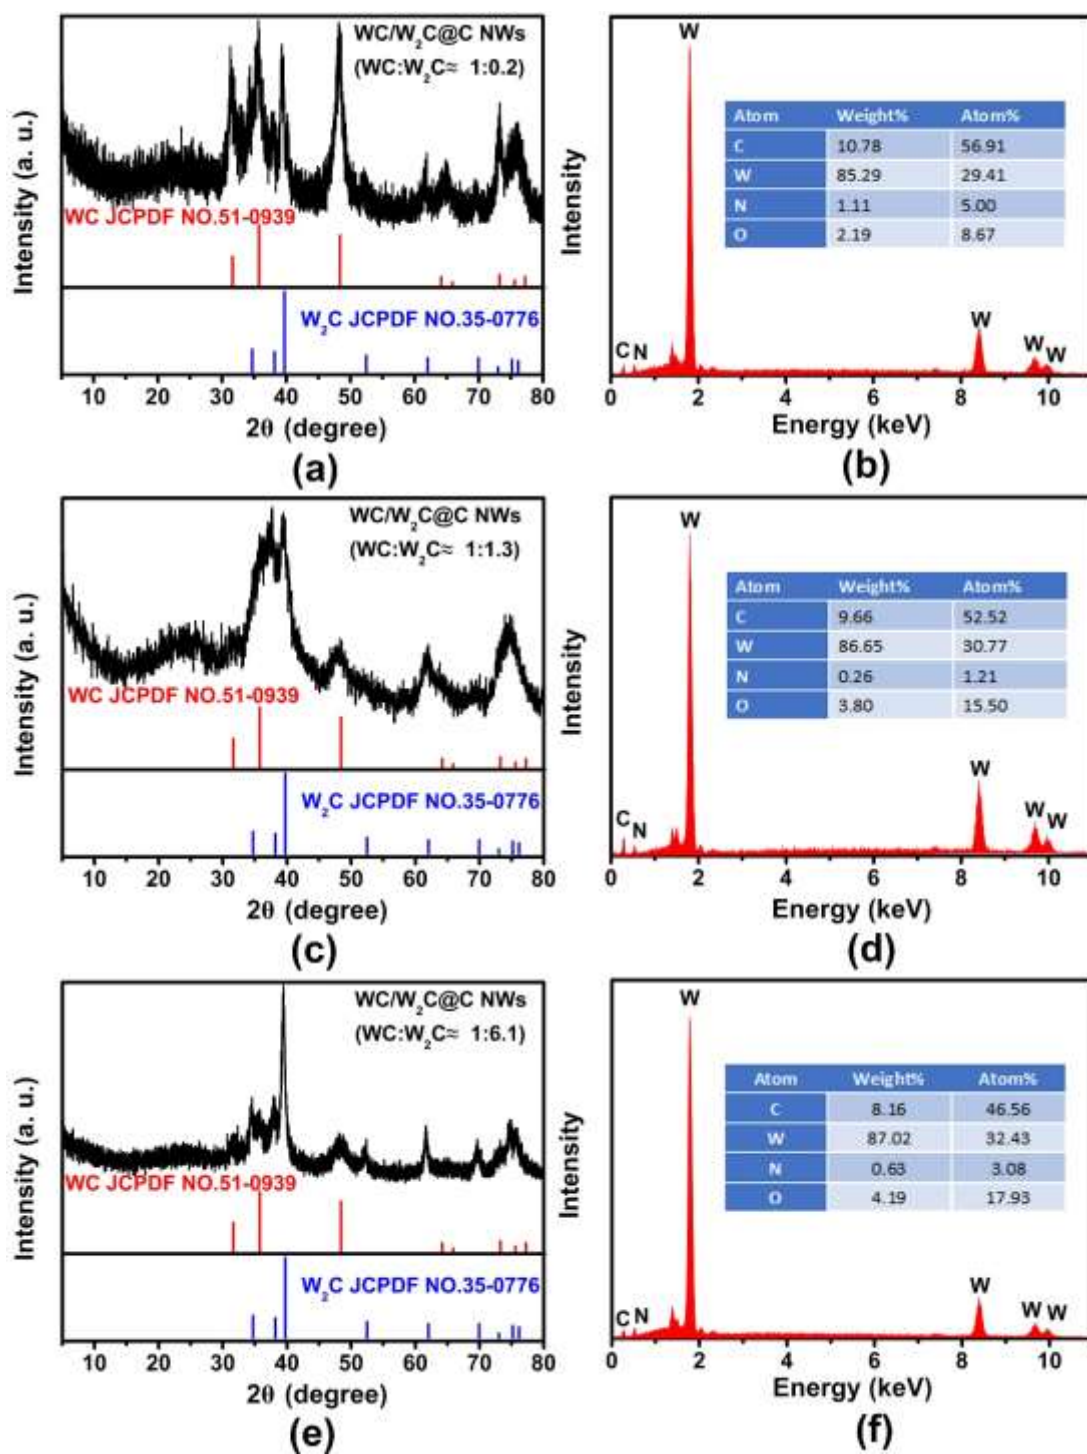

**Fig. S3** (a)-(b) Powder XRD pattern and EDX spectrum of WC/W<sub>2</sub>C@C NWs (WC:W<sub>2</sub>C ≈ 1:0.2); (c)-(d) Powder XRD pattern and EDX spectrum of WC/W<sub>2</sub>C@C NWs (WC:W<sub>2</sub>C ≈ 1:1.3); (e)-(f) Powder XRD pattern and EDX spectrum of WC/W<sub>2</sub>C@C NWs (WC:W<sub>2</sub>C ≈ 1:6.1).

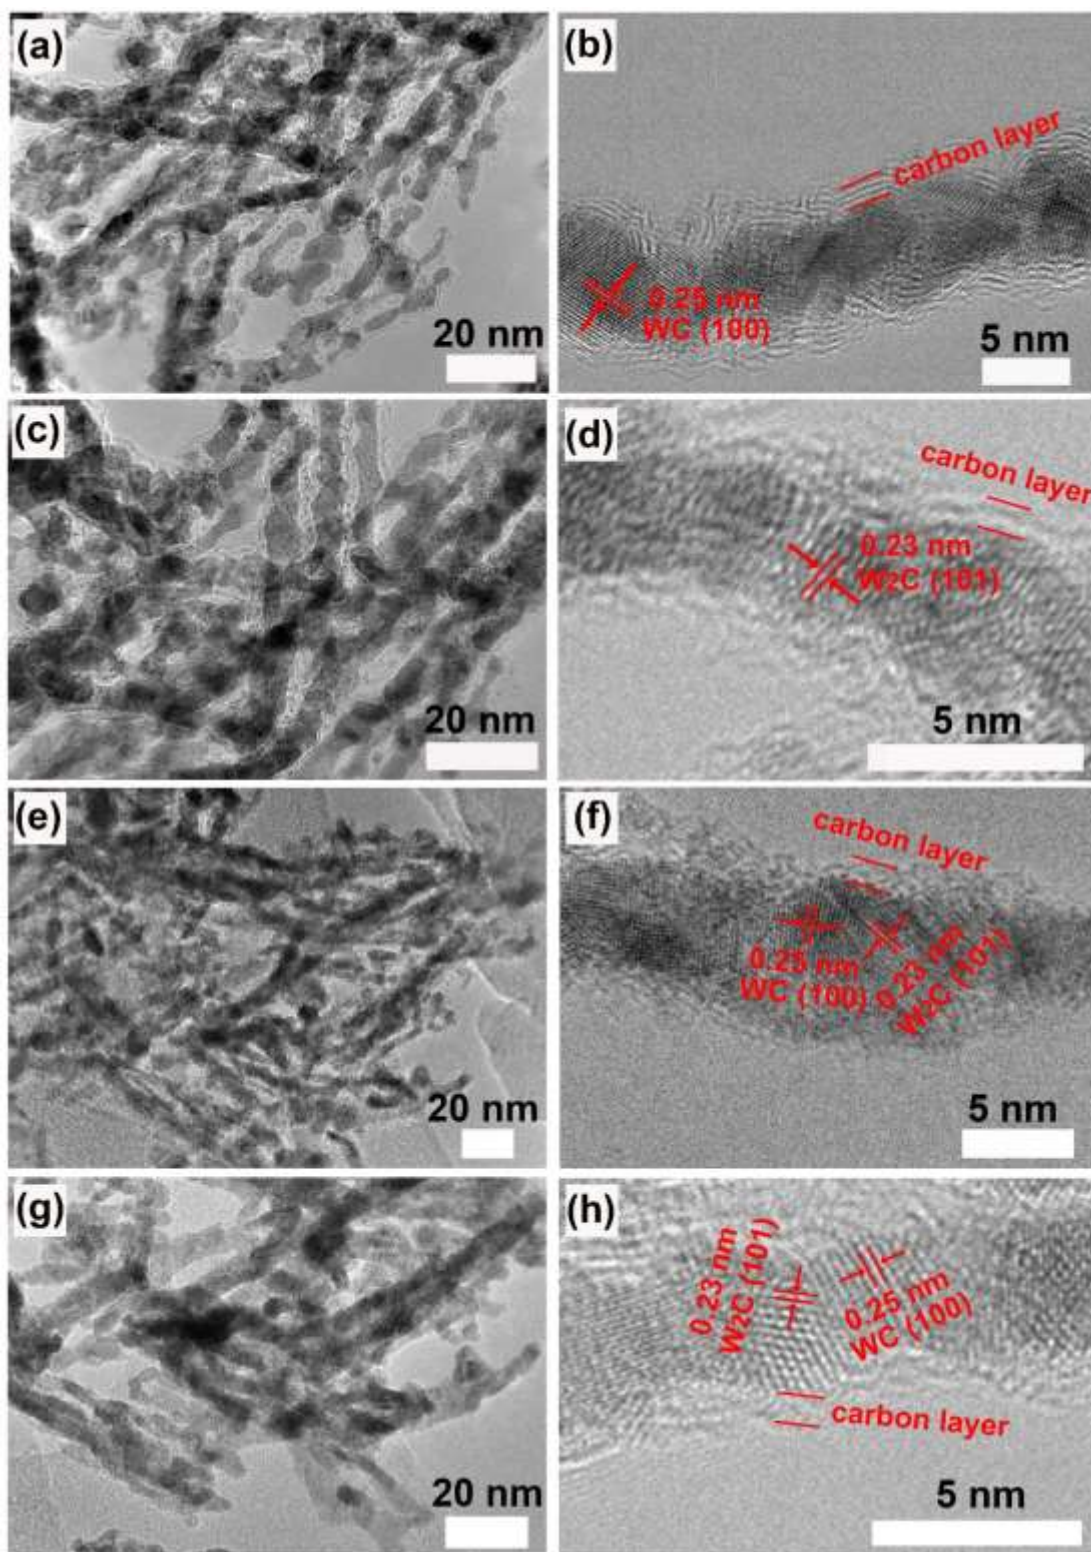

**Fig. S4** (a)-(b) TEM images of WC@C NWs; (c)-(d) TEM images of W<sub>2</sub>C@C NWs; (e)-(f) TEM images of WC/W<sub>2</sub>C@C NWs (WC:W<sub>2</sub>C $\approx$ 1:0.2); (g)-(h) TEM images of WC/W<sub>2</sub>C@C NWs (WC:W<sub>2</sub>C $\approx$ 1:6.1).



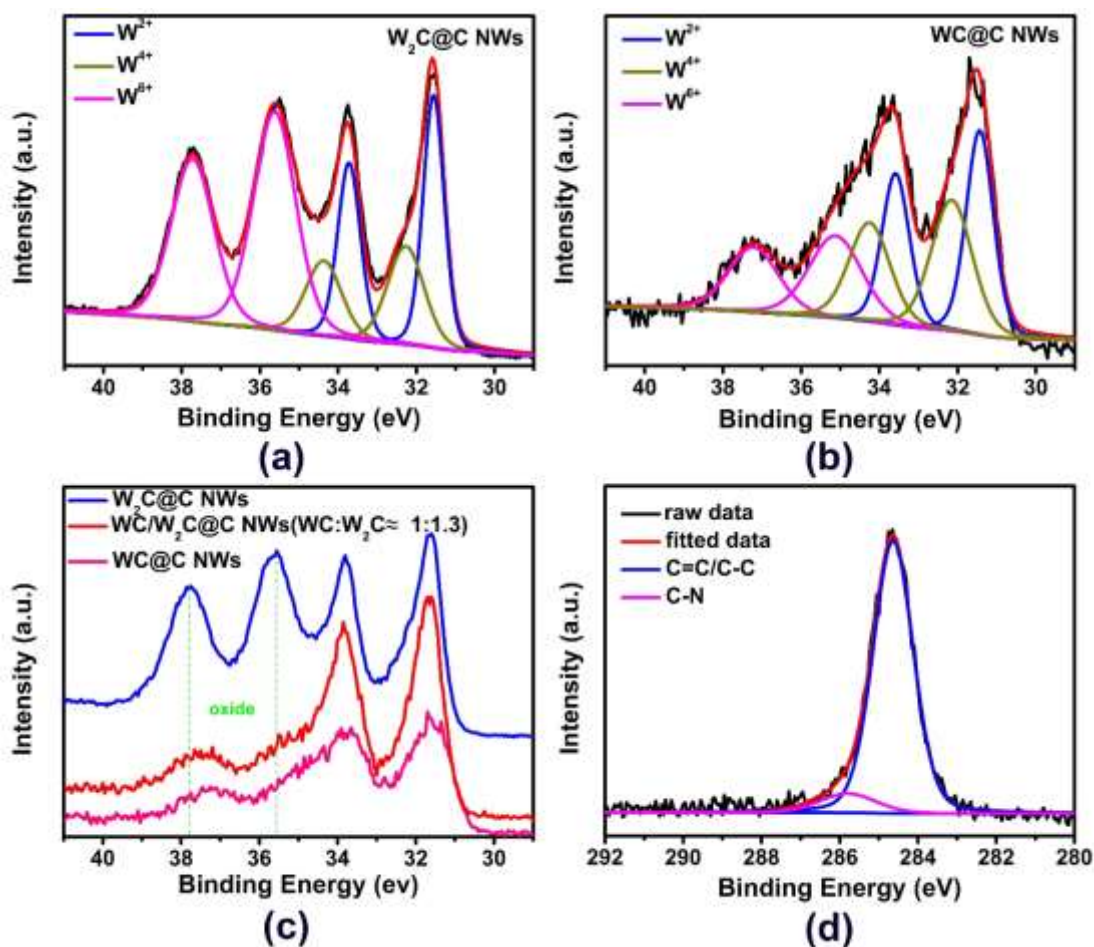

**Fig. S5** The high resolution of W 4f XPS spectra of (a)  $W_2C@C$  NWs and (b)  $WC@C$  NWs; (c) The comparison of high resolution of W 4f XPS spectra of  $W_2C@C$  NWs,  $WC/W_2C@C$  NWs ( $WC:W_2C \approx 1:1.3$ ) and  $WC@C$  NWs; (d) The high resolution of C 1s XPS spectrum of  $WC/W_2C@C$  NWs ( $WC:W_2C \approx 1:1.3$ ).

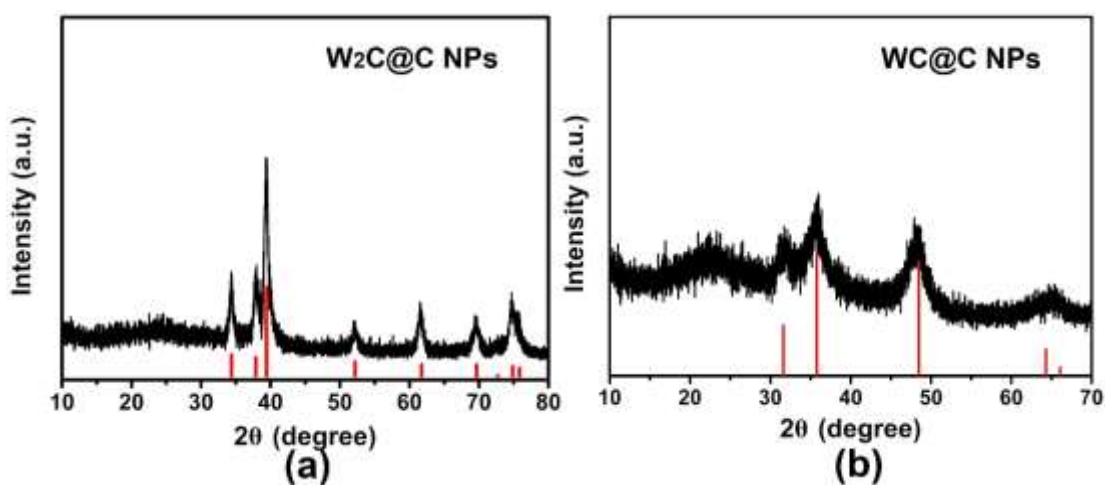

**Fig. S6** Powder XRD patterns of (a)  $W_2C@C$  NPs and (b)  $WC@C$  NPs.

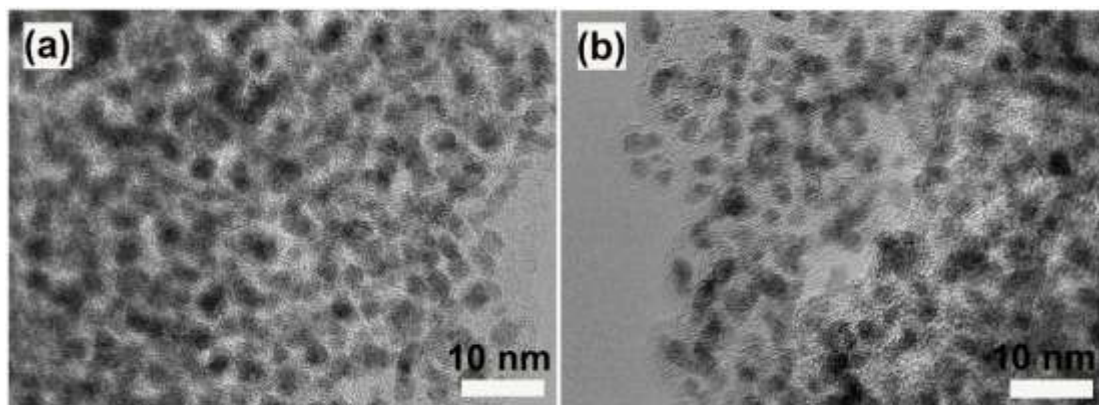

**Fig. S7** TEM images of (a)  $W_2C@C$  NPs and (b)  $WC@C$  NPs.  $W_2C$  and  $WC$  NPs are both covered with few-layer graphite-like carbon.

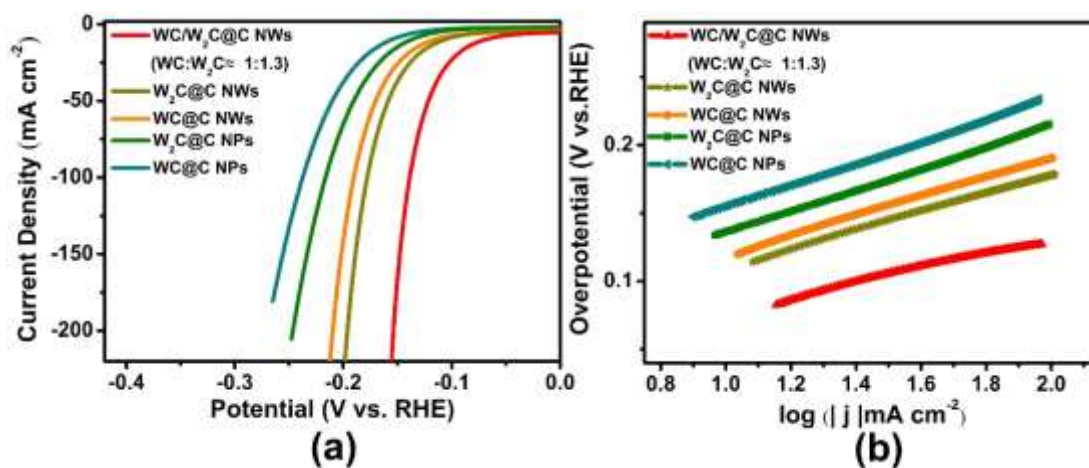

**Fig. S8** (a) LSV plots and corresponding Tafel plots of  $WC/W_2C@C$  NWs ( $WC:W_2C \approx 1:1.3$ ),  $W_2C@C$  NWs,  $WC@C$  NWs,  $W_2C@C$  NPs and  $WC@C$  NPs in 0.5 M  $H_2SO_4$ .

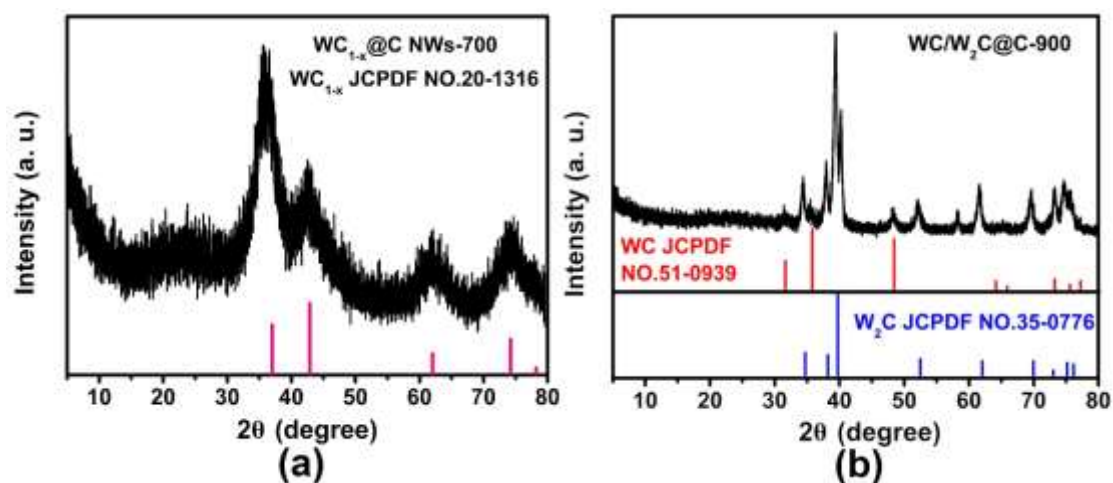

**Fig. S9** Powder XRD patterns of (a)  $WC_{1-x}@C$  NWs-700 and (b)  $WC/W_2C@C$ -900.

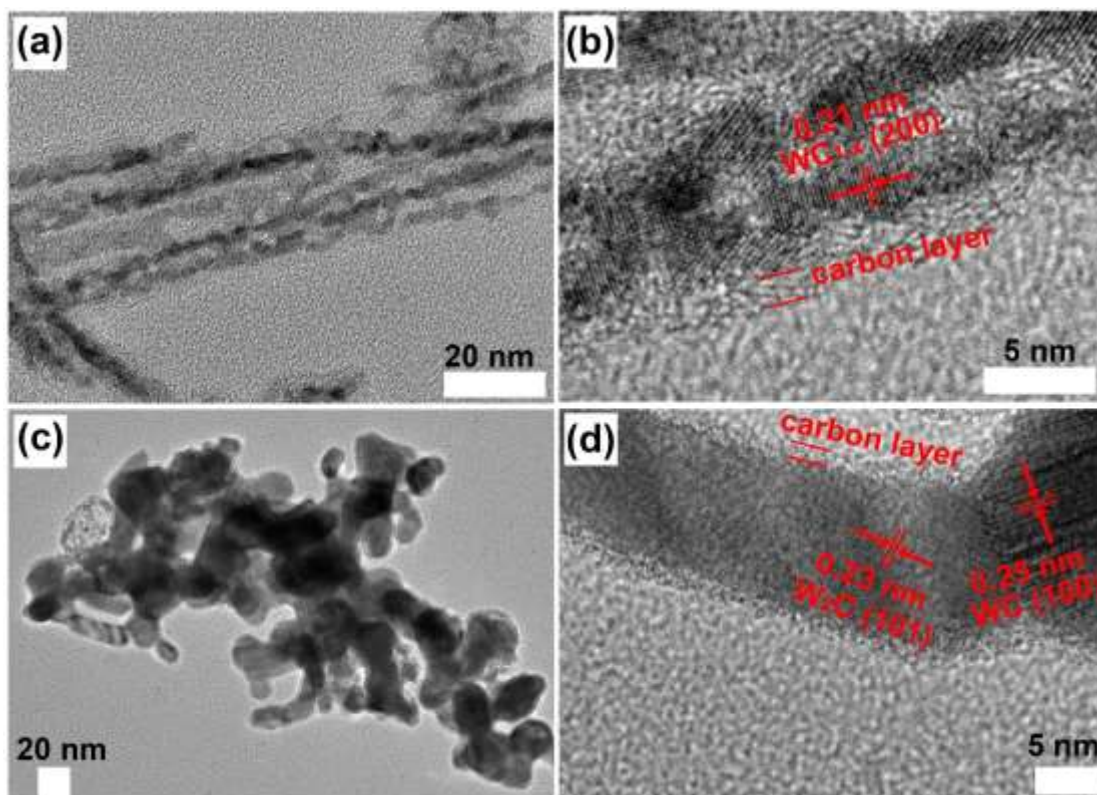

**Fig. S10** (a)-(b) TEM images of  $WC_{1-x}@C$  NWs-700, tungsten carbides can retain the ultrafine one-dimensional nanowire morphology of  $W_{18}O_{49}$  when the carburization temperature is 700 °C; (c)-(d) TEM images of  $WC/W_2C@C$ -900, tungsten carbides failed to retain well the ultrafine one-dimensional nanowire morphology while exists partially sintering when the carburization temperature is 900 °C.

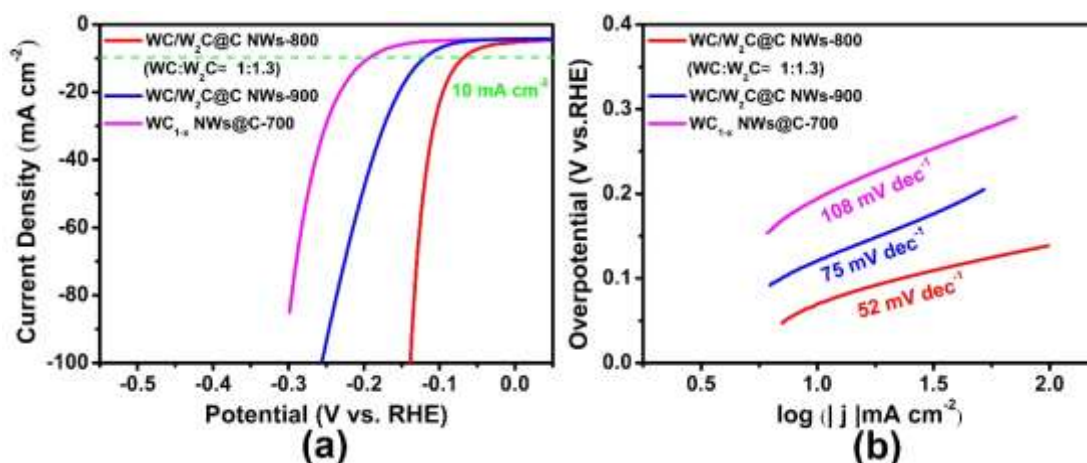

**Fig. S11** (a) LSV plots of WC<sub>1-x</sub>@C NWs-700, WC/W<sub>2</sub>C@C NWs-800 (WC:W<sub>2</sub>C≈1:1.3) and WC/W<sub>2</sub>C@C-900; (b) Tafel curves of WC<sub>1-x</sub>@C NWs-700, WC/W<sub>2</sub>C@C NWs-800 (WC:W<sub>2</sub>C≈1:1.3) and WC/W<sub>2</sub>C@C-900. The optimal pyrolysis temperature is 800 °C, which may be related to the suitable phase composition and well-defined one-dimensional nanowire morphology.

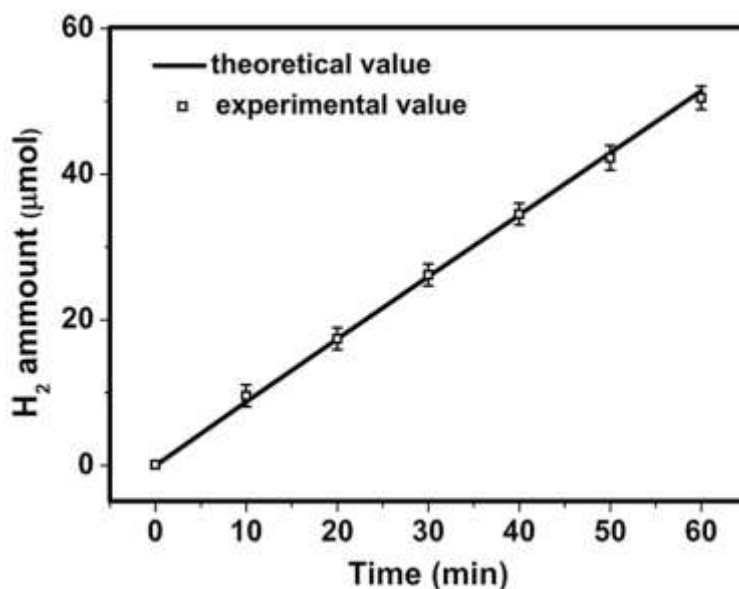

**Fig. S12** Faradaic efficiency of WC/W<sub>2</sub>C@C NWs (WC:W<sub>2</sub>C≈1:1.3) towards HER in 0.5 M H<sub>2</sub>SO<sub>4</sub> at the overpotential of 120 mV.

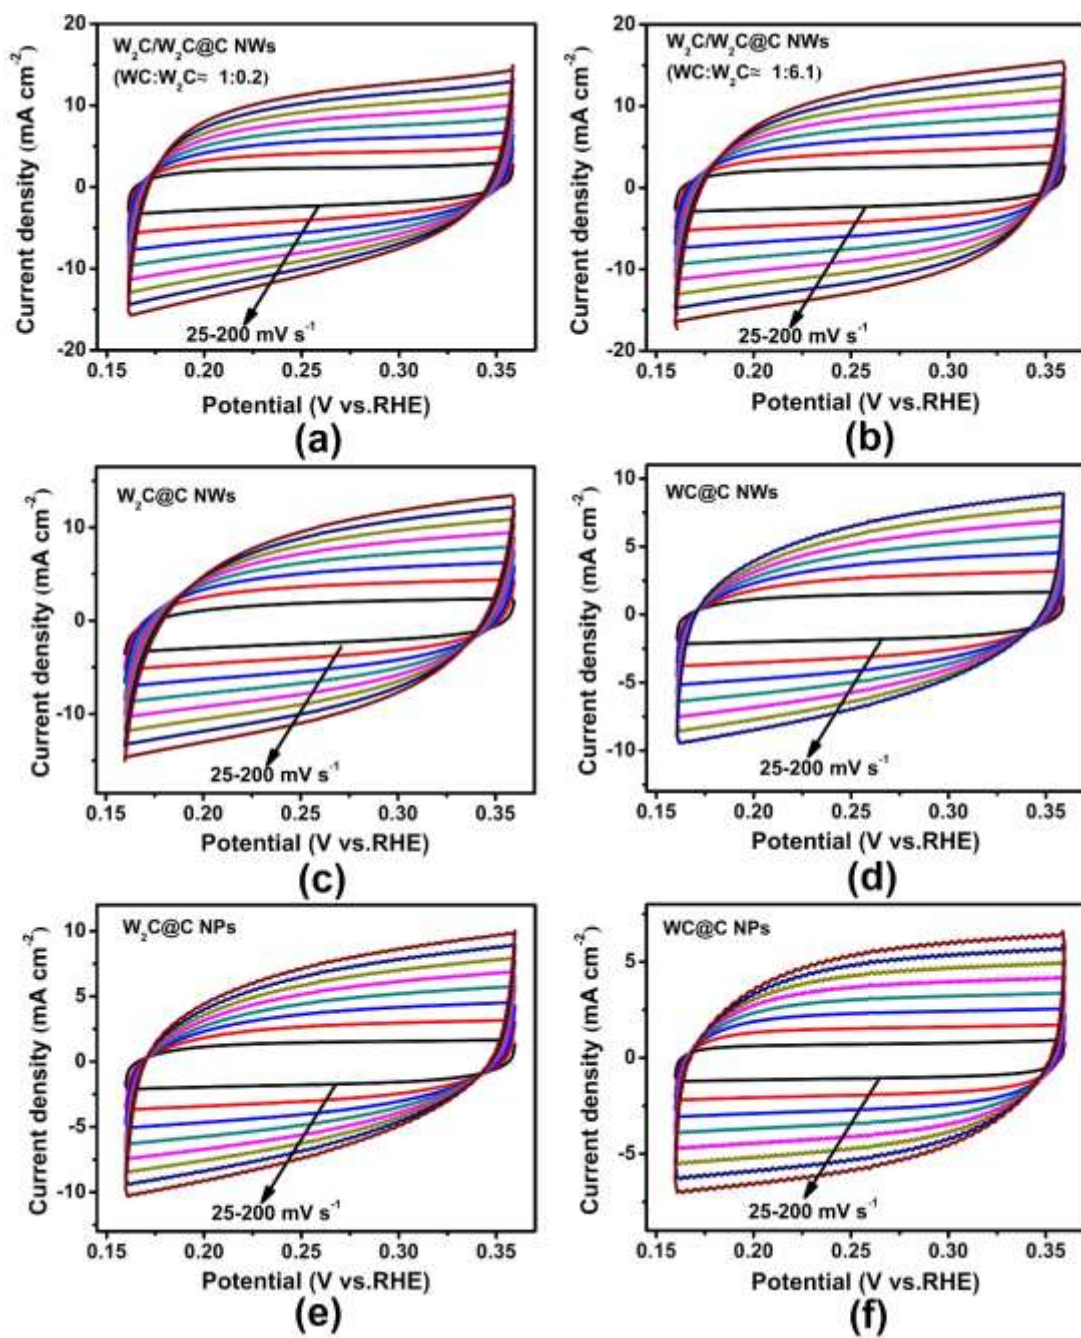

**Fig. S13** CV curves of (a) WC/W<sub>2</sub>C@C NWs (WC:W<sub>2</sub>C≈1:0.2); (b) WC/W<sub>2</sub>C@C NWs (WC:W<sub>2</sub>C≈1:6.1); (c) W<sub>2</sub>C@C NWs; (d) WC@C NWs; (e) W<sub>2</sub>C@C NPs and (f) WC@C NPs with different scan rates from 25 to 200 mV s<sup>-1</sup> in 0.5 M H<sub>2</sub>SO<sub>4</sub>.

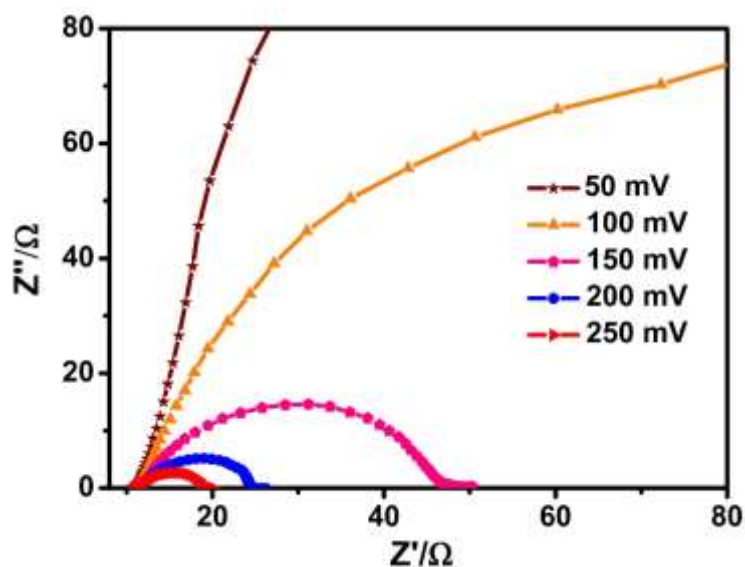

**Fig. S14** Electrochemical impedance spectra (EIS) of WC/W<sub>2</sub>C@C NWs (WC:W<sub>2</sub>C≈1:1.3) measured with overpotentials from 50 to 250 mV in 0.5 M H<sub>2</sub>SO<sub>4</sub>.

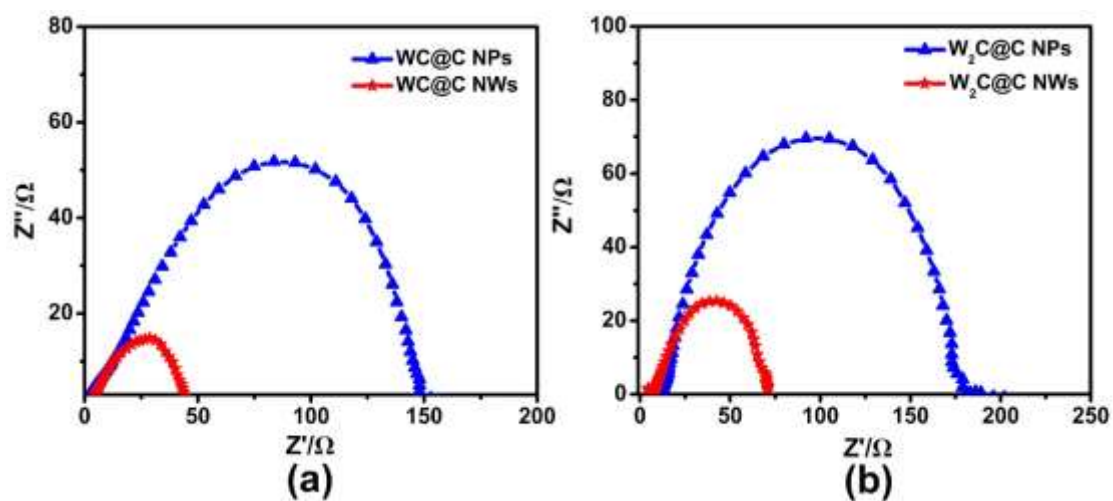

**Fig. S15** (a) Nyquist plots of WC@C NWs and WC@C NPs at an overpotential of 150 mV in 0.5 M H<sub>2</sub>SO<sub>4</sub>; (b) Nyquist plots of W<sub>2</sub>C@C NWs and W<sub>2</sub>C@C NPs at an overpotential of 150 mV in 0.5 M H<sub>2</sub>SO<sub>4</sub>.

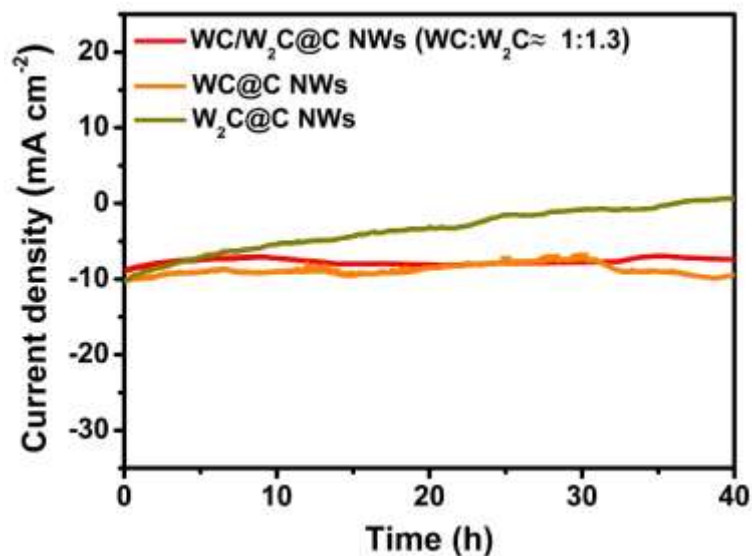

**Fig. S16** I-T curves of WC/W<sub>2</sub>C@C NWs (WC:W<sub>2</sub>C≈1:1.3), WC@C NWs and W<sub>2</sub>C@C NWs for 40 h (initial current density = - 10 mA cm<sup>-2</sup>).

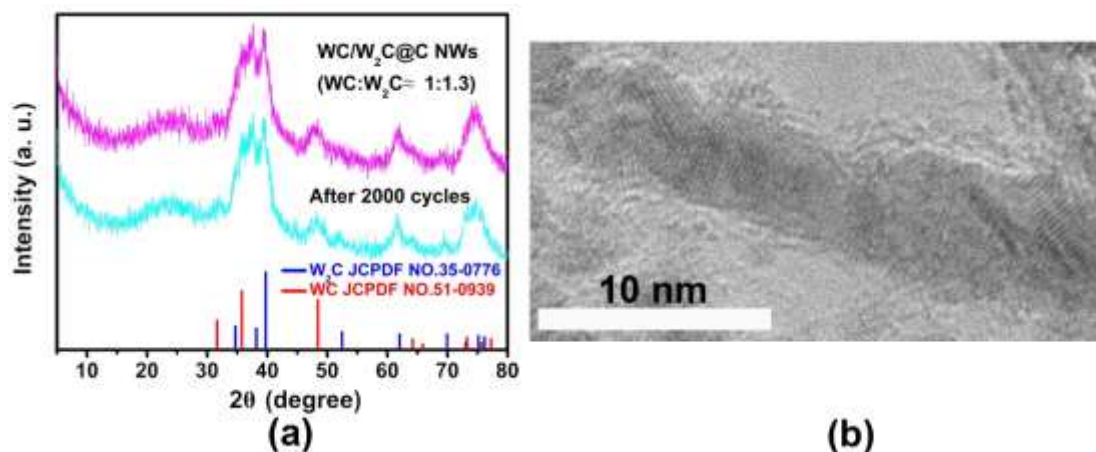

**Fig. S17** (a) The PXRD patterns of WC/W<sub>2</sub>C@C NWs (WC:W<sub>2</sub>C≈1:1.3) (pink line) and after 2000 cycles (blue line). These results reveal that the structure of WC/W<sub>2</sub>C@C NWs (WC:W<sub>2</sub>C≈1:1.3) can be remained after 2000 cycles HER test; (b) TEM image of WC/W<sub>2</sub>C@C NWs (WC:W<sub>2</sub>C≈1:1.3) after 2000 cycles test. The image show that the nanowire morphology of WC/W<sub>2</sub>C@C NWs (WC:W<sub>2</sub>C≈1:1.3) catalyst shows negligible changes.

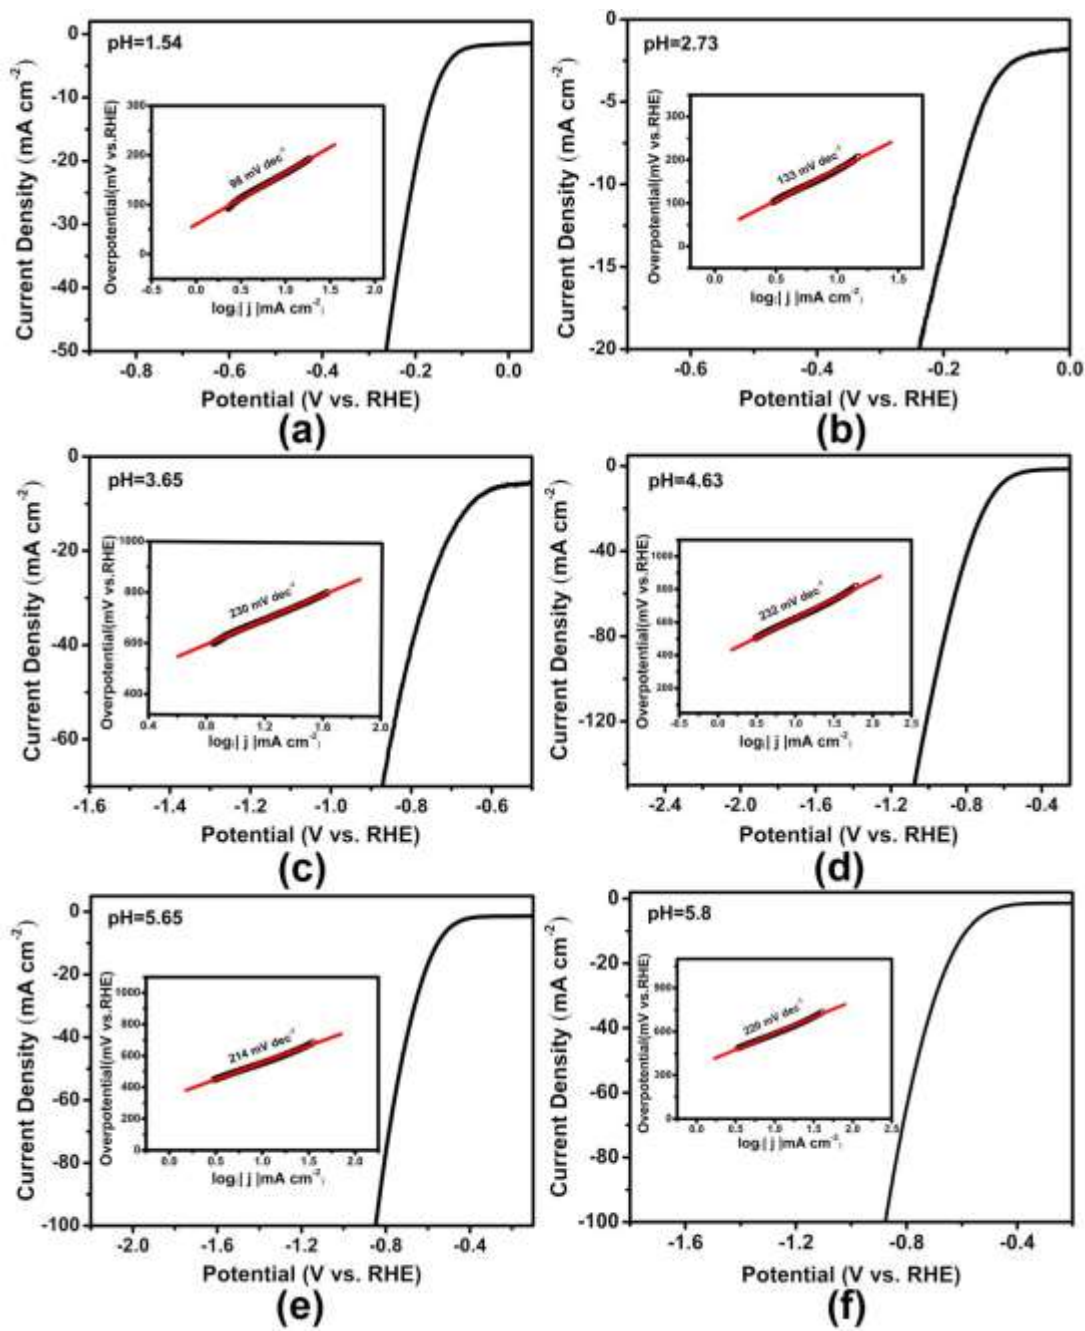

**Fig. S18** The HER polarization plots of WC/W<sub>2</sub>C@C NWs (WC:W<sub>2</sub>C ≈ 1:1.3) in pH (a) 1.54, (b) 2.73, (c) 3.65, (d) 4.63, (e) 5.65 and (f) 5.8 electrolytes at scan rate of 5 mV s<sup>-1</sup>. Insert: The corresponding Tafel plots of WC/W<sub>2</sub>C@C NWs (WC:W<sub>2</sub>C ≈ 1:1.3).



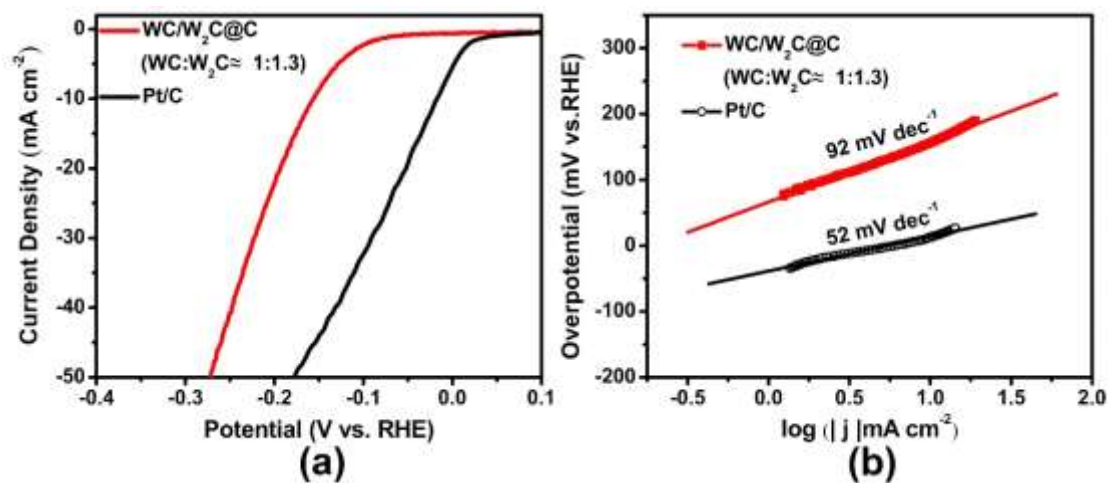

**Fig. S19** (a) The HER polarization plots of WC/W<sub>2</sub>C@C NWs (WC:W<sub>2</sub>C≈1:1.3) and Pt/C in 1 M PBS (pH=7) ;(b) The corresponding Tafel plots of WC/W<sub>2</sub>C@C NWs (WC:W<sub>2</sub>C≈1:1.3) and Pt/C in 1 M PBS.

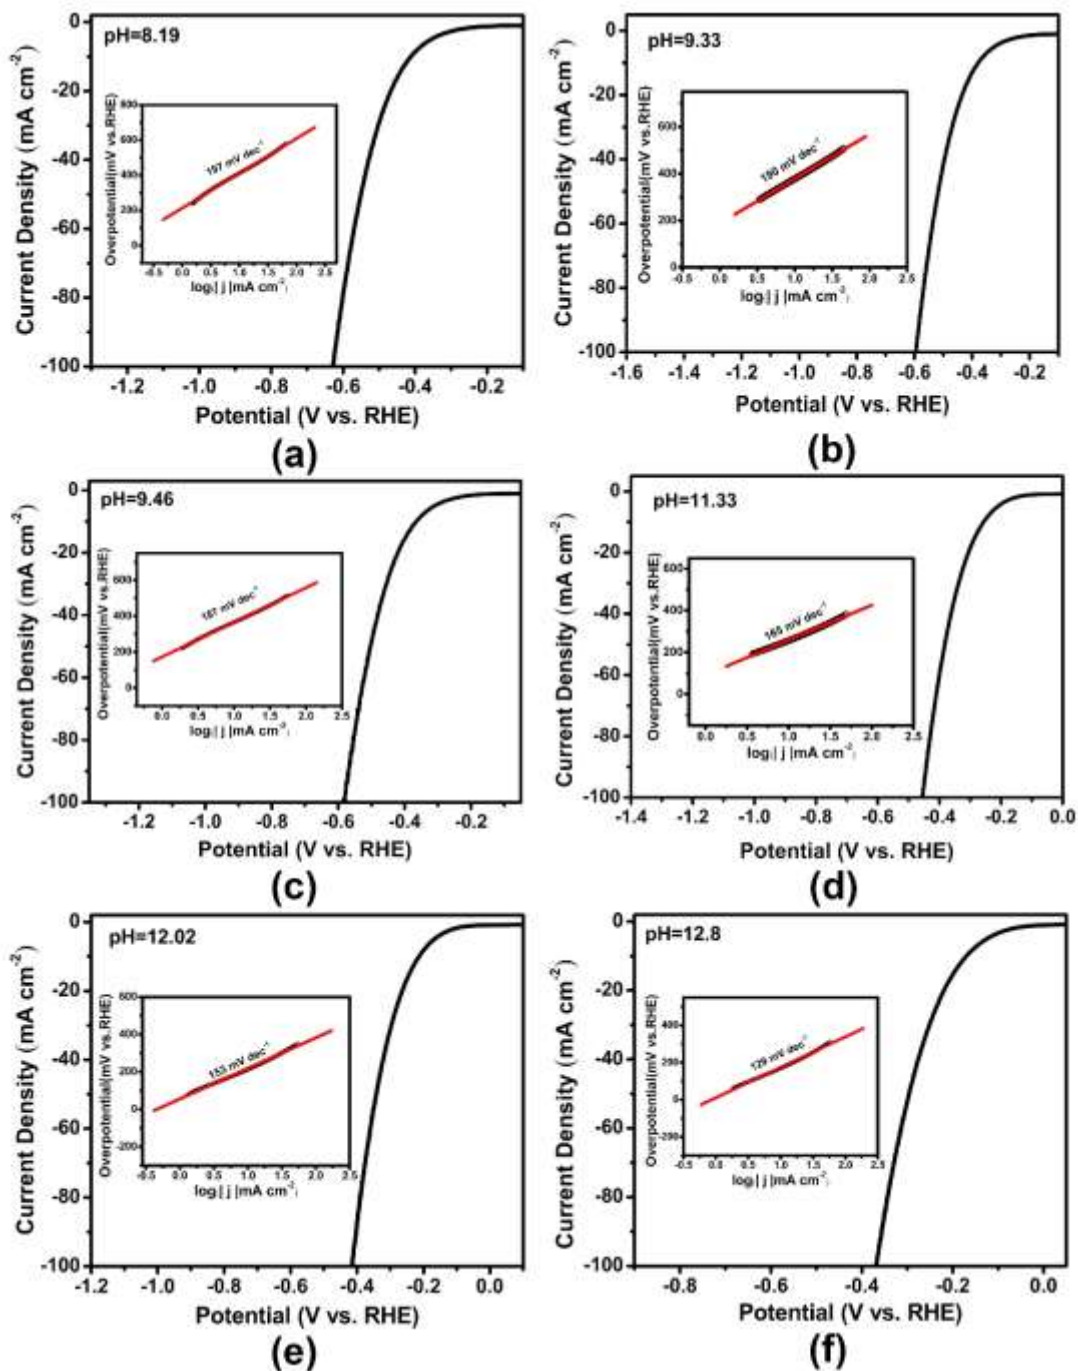

**Fig. S20** The HER polarization plots of WC/W<sub>2</sub>C@C NWs (WC:W<sub>2</sub>C ≈ 1:1.3) in pH (a) 8.19, (b) 9.33, (c) 9.46, (d) 11.33, (e) 12.02 and (f) 12.8 electrolytes at scan rate of 5 mV s<sup>-1</sup>. Insert: The corresponding Tafel plots of WC/W<sub>2</sub>C@C NWs (WC:W<sub>2</sub>C ≈ 1:1.3).

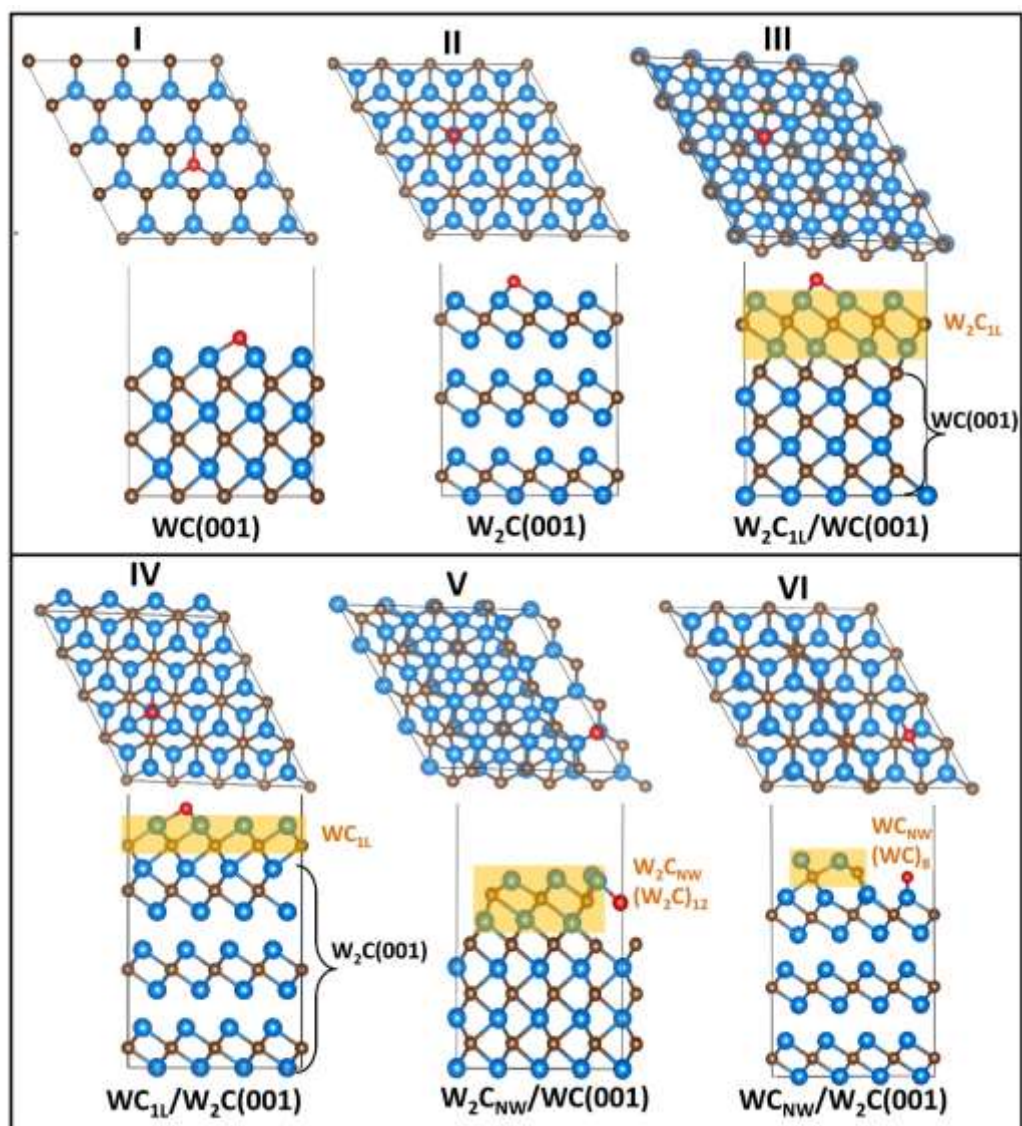

**Fig. S21** Theoretical models of the studied systems. Color code: W (light blue), C (brown), and H (red).

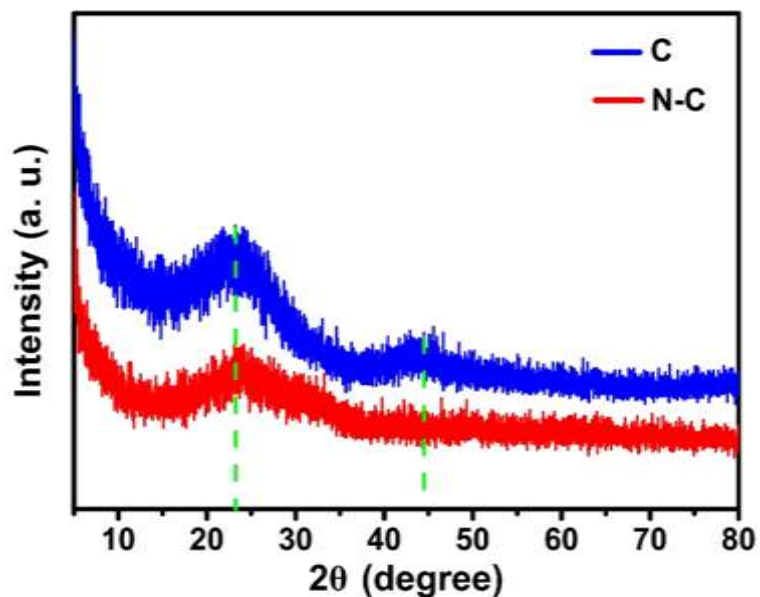

**Fig. S22** PXRD patterns of C and N-C. In order to demonstrate the importance of WC in WC/W<sub>2</sub>C@C NWs electrocatalysts, N doped carbon (labeled with N-C) and carbon (labeled with C) have been prepared. The preparation method of N-C is as follows: Pure urea was heated to 500 °C for 2 h with a heating rate of 2 °C min<sup>-1</sup> in air, the as-obtained C<sub>3</sub>N<sub>4</sub> powder was then heated to 800 °C for 6 h in N<sub>2</sub> atmosphere with a ramp rate of 5 °C min<sup>-1</sup>. Carbon without nitrogen (C) is obtained by the pyrolysis of glucose (C<sub>6</sub>H<sub>12</sub>O<sub>6</sub>) at 800 °C for 6 h with a heating rate of 5 °C min<sup>-1</sup> in N<sub>2</sub>. The powder X-ray diffraction (PXRD) patterns of N-C and C show similar characteristic peaks of graphite carbon.

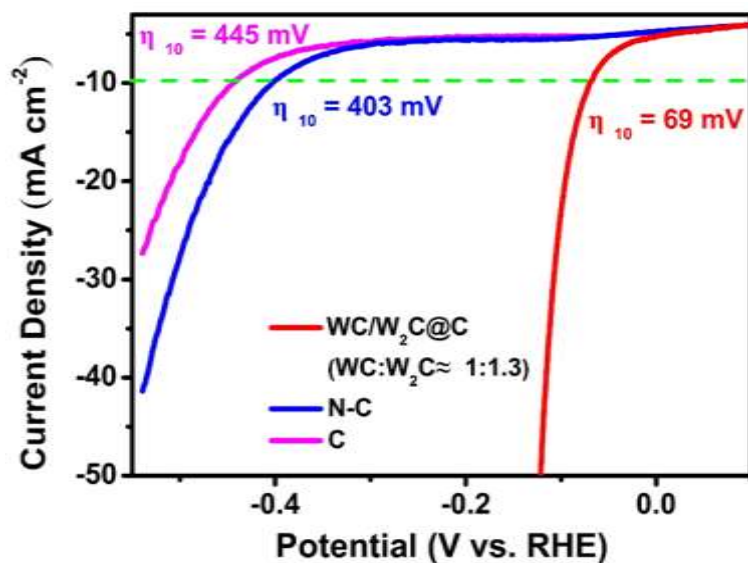

**Fig. S23** LSV plots of WC/W<sub>2</sub>C@C NWs (WC:W<sub>2</sub>C≈1:1.3), N-C and C in 0.5 M H<sub>2</sub>SO<sub>4</sub>. As shown in Fig. S23, the hydrogen production activity of WC/W<sub>2</sub>C@C NWs (WC:W<sub>2</sub>C≈1:1.3) is much higher than that of N-C and C, which indicates that tungsten carbide is the real HER electrocatalytic active site in nano-heterojunction catalysts. Furthermore, N-C shows slightly higher HER performance than that of C, confirming the effect of nitrogen doping on improving the HER activities of electrocatalysts.

## Supporting Tables

**Table S1.** Quantitative Analysis from Profile-Fitted PXRD Peaks of WC/W<sub>2</sub>C@C NWs.

| component<br>catalyst                                                                                                       | WC/% | W <sub>2</sub> C/% |
|-----------------------------------------------------------------------------------------------------------------------------|------|--------------------|
| WC/W <sub>2</sub> C@C NWs<br>(WC:W <sub>2</sub> C≈1:0.2)                                                                    | 84   | 16                 |
| WC/W <sub>2</sub> C@C NWs<br>(WC:W <sub>2</sub> C≈1:1.3)                                                                    | 44   | 56                 |
| WC/W <sub>2</sub> C@C NWs<br>(WC:W <sub>2</sub> C≈1:6.1)                                                                    | 14   | 86                 |
| The phase composition ratio of WC and W <sub>2</sub> C is determined by the PXRD phase quantitative analysis using Jade 6.5 |      |                    |

**Table S2.** Details for the controlled synthesis of tungsten carbide electrocatalysts from urea and W<sub>18</sub>O<sub>49</sub> NWs.

| products                                                 | the mass ratio of W <sub>18</sub> O <sub>49</sub><br>NWs and urea | temperature (°C) |
|----------------------------------------------------------|-------------------------------------------------------------------|------------------|
| WC@C NWs                                                 | 1:200                                                             | 800              |
| WC/W <sub>2</sub> C@C NWs<br>(WC:W <sub>2</sub> C≈1:0.2) | 1:150                                                             | 800              |
| WC/W <sub>2</sub> C@C NWs<br>(WC:W <sub>2</sub> C≈1:1.3) | 1:100                                                             | 800              |

|                                                          |       |     |
|----------------------------------------------------------|-------|-----|
| WC/W <sub>2</sub> C@C NWs<br>(WC:W <sub>2</sub> C≈1:6.1) | 1:75  | 800 |
| W <sub>2</sub> C@C NWs                                   | 1:50  | 800 |
| WC <sub>1-x</sub> @C NWs-700                             | 1:100 | 700 |
| WC/W <sub>2</sub> C@C-900                                | 1:100 | 900 |

**Table S3.** The electrochemical parameters of various tungsten-carbide-based electrocatalysts for HER in 0.5 M H<sub>2</sub>SO<sub>4</sub>.

| Cat.                                                     | $\eta_{10}$ (mV) | Tafel slope (mV dec <sup>-1</sup> ) | Cdl <sup>a</sup> (mF cm <sup>-2</sup> ) | $j_0^b$ (mA cm <sup>-2</sup> ) |
|----------------------------------------------------------|------------------|-------------------------------------|-----------------------------------------|--------------------------------|
| WC/W <sub>2</sub> C@C NWs<br>(WC:W <sub>2</sub> C≈1:1.3) | 69               | 52                                  | 61                                      | 0.361                          |
| WC/W <sub>2</sub> C@C NWs<br>(WC:W <sub>2</sub> C≈1:6.1) | 80               | 60                                  | 56                                      | 0.355                          |
| WC/W <sub>2</sub> C@C NWs<br>(WC:W <sub>2</sub> C≈1:0.2) | 95               | 63                                  | 49                                      | 0.278                          |
| W <sub>2</sub> C@C NWs                                   | 106              | 68                                  | 46                                      | 0.241                          |
| WC@C NWs                                                 | 115              | 71                                  | 33                                      | 0.211                          |
| W <sub>2</sub> C@C NPs                                   | 137              | 78                                  | 31                                      | 0.191                          |
| WC@C NPs                                                 | 155              | 80                                  | 27                                      | 0.119                          |

<sup>a</sup>Data are calculated based on the CV results (Figure S12). <sup>b</sup>Exchange current densities ( $j_0$ ) are obtained from Tafel curves by using extrapolation method.

**Table S4.** The values of charge transfer resistance ( $R_{ct}$ ) for W<sub>2</sub>C@C NPs, WC@C NPs, W<sub>2</sub>C@C NWs, WC@C NWs and WC/W<sub>2</sub>C@C NWs (WC:W<sub>2</sub>C≈1:1.3) at an overpotential of 150 mV in 0.5 M H<sub>2</sub>SO<sub>4</sub>.

| Cat. | $R_{ct}$ ( $\Omega$ ) |
|------|-----------------------|
|------|-----------------------|

|                             |       |
|-----------------------------|-------|
| W <sub>2</sub> C@C NPs      | 160   |
| WC@C NPs                    | 124   |
| W <sub>2</sub> C@C NWs      | 84.5  |
| WC@C NWs                    | 37.5  |
| WC/W <sub>2</sub> C@C NWs   | 32.54 |
| (WC:W <sub>2</sub> C≈1:1.3) |       |

**Table S5.** The values of charge transfer resistance ( $R_{ct}$ ) and a series resistance ( $R_s$ ) for WC/W<sub>2</sub>C@C NWs (WC:W<sub>2</sub>C≈1:1.3) with overpotential from 50 to 250 mV in 0.5 M H<sub>2</sub>SO<sub>4</sub>.

| Potential (mV vs. RHE) | WC/W <sub>2</sub> C@C NWs   |                    |
|------------------------|-----------------------------|--------------------|
|                        | (WC:W <sub>2</sub> C≈1:1.3) |                    |
|                        | $R_{ct}$ ( $\Omega$ )       | $R_s$ ( $\Omega$ ) |
| 50                     | 1524                        | 11.20              |
| 100                    | 168                         | 11.28              |
| 150                    | 32.54                       | 11.26              |
| 200                    | 11.84                       | 11.07              |
| 250                    | 6.53                        | 11.10              |



**Table S6.** Comparison of catalytic parameters of WC/W<sub>2</sub>C@C NWs (WC:W<sub>2</sub>C≈1:1.3) in different electrolytes.

| pH value | Overpotential at 10<br>mA cm <sup>-2</sup> (mV vs<br>RHE) | Tafel slope (mV<br>dec <sup>-1</sup> ) |
|----------|-----------------------------------------------------------|----------------------------------------|
| 0.3      | 69                                                        | 52                                     |
| 1.54     | 162                                                       | 98                                     |
| 2.73     | 176                                                       | 133                                    |
| 3.65     | 649                                                       | 230                                    |
| 4.63     | 621                                                       | 232                                    |
| 5.65     | 552                                                       | 214                                    |
| 5.8      | 583                                                       | 220                                    |
| 7.0      | 155                                                       | 92                                     |
| 8.19     | 412                                                       | 197                                    |
| 9.33     | 378                                                       | 190                                    |
| 9.46     | 365                                                       | 187                                    |
| 11.33    | 256                                                       | 165                                    |
| 12.02    | 212                                                       | 153                                    |
| 12.8     | 169                                                       | 129                                    |
| 14.0     | 56                                                        | 59                                     |

**Table S7.** Comparison of HER performance in acidic and alkaline media for WC/W<sub>2</sub>C@C NWs (WC:W<sub>2</sub>C≈1:1.3) with other W-based HER electrocatalysts.

| Catalyst                                                     | Overpotential                  | Overpotential                | Ref.             |
|--------------------------------------------------------------|--------------------------------|------------------------------|------------------|
|                                                              | (mV) in 0.5 M                  | (mV) in 1 M                  |                  |
|                                                              | H <sub>2</sub> SO <sub>4</sub> | KOH                          |                  |
| <b>WC/W<sub>2</sub>C@C NWs<br/>(WC:W<sub>2</sub>C≈1:1.3)</b> | <b>69</b>                      | <b>56</b>                    | <b>This work</b> |
| WC-CNTs                                                      | 145                            | 137                          | [S8]             |
| (Mo <sub>2</sub> C) <sub>0.34</sub> -                        | 100                            | 93                           | [S9]             |
| (WC) <sub>0.32</sub> /NG                                     |                                |                              |                  |
| W <sub>2</sub> C@GL                                          | 135                            | N.A.                         | [S10]            |
| p-WC <sub>x</sub> NWs                                        | 118                            | 122                          | [S11]            |
| WO <sub>x</sub> /C NWs                                       | 108                            | N.A.                         | [S12]            |
| C-CWC                                                        | 200                            | 73                           | [S13]            |
| Ni-S-W-C                                                     | N.A.                           | 262 (in 30%<br>KOH solution) | [S14]            |
| WSe <sub>2</sub> nanofilms                                   | 189                            | N.A.                         | [S15]            |
| C-WP/W                                                       | 109                            | 133                          | [S16]            |
| W <sub>x</sub> C/NG-10                                       | 77.82                          | N.A.                         | [S17]            |
| W/BrN                                                        | 148                            | 94                           | [S18]            |
| CoS <sub>2</sub> @WS <sub>2</sub>                            | 97.2                           | N.A.                         | [S19]            |
| Mo-W-S/CC                                                    | 198                            | N.A.                         | [S20]            |

---

|                         |      |                    |       |
|-------------------------|------|--------------------|-------|
| $W_{18}O_{49}$ NFs      | 425  | N.A.               | [S21] |
| WP <sub>2</sub> SMPs    | 161  | 153                | [S22] |
| W <sub>2</sub> C-NC-WN  | N.A. | 145                | [S23] |
| i-WC-G                  | 120  | 225 (0.1 M<br>KOH) | [S24] |
| PWC                     | 274  | N.A.               | [S25] |
| Co <sub>2</sub> P/WC@NC | 91   | 180                | [S26] |

---

## **The detailed HER mechanism in heterojunction catalysts**

In principle, the HER pathway in acidic solution can be depicted as three steps: the adsorption of  $H^+$  on the surface of catalyst, the reduction of  $H^+$  to adsorbed H ( $H_{ads}$ ) on catalyst, and the desorption of  $H_{ads}$  to generate  $H_2$ . Regarding the overall HER process, a good hydrogen catalyst should have a free energy ( $\Delta G_H^*$ ) for H adsorption close to zero and a suitable bond strength between the surface of catalyst and  $H_{ads}$ , which is favourable for the adsorption of proton and the desorption of  $H_2$ . According to the results of our DFT calculations, charge rearrangement occurs at the two phase interfaces in one-dimensional WC/W<sub>2</sub>C heterojunction nanowires, which endows the catalysts with optimized electronic configuration and suitable  $\Delta G_H^*$ . The intrinsic hydrogen production activities of two components have been synergistically improved, which is similar to other heterojunction HER catalysts (eg. Fe<sub>3</sub>C-Mo<sub>2</sub>C hetero-nanofibers,<sup>[S27]</sup> MoC-Mo<sub>2</sub>C heteronanowires<sup>[S28]</sup>). Besides the above, the conductivity and stability of our WC/W<sub>2</sub>C heterojunction catalysts have also been obviously enhanced by constructing multiple two-phase heterojunction interfaces. That is to say, in WC/W<sub>2</sub>C heterojunction nanowires, the decent HER performance is not only due to the improvement of intrinsic hydrogen production activity of two components, but also attributed to the enhancement on its conductivity and stability.

## References

- [S1] G. Kresse, J. Hafner, *Phys. Rev. B: Condens. Matter Mater. Phys.*, 1993, **47**, 558.
- [S2] G. Kresse, J. Hafner, *Phys. Rev. B: Condens. Matter Mater. Phys.*, 1994, **49**, 14251.
- [S3] G. Kresse, J. Furthmuller, *Comput. Mater. Sci.*, 1996, **6**, 15.
- [S4] G. Kresse, J. Furthmuller, *Phys. Rev. B: Condens. Matter Mater. Phys.*, 1996, **54**, 11169.
- [S5] P. E. Blöchl, *Phys. Rev. B.*, 1994, **50**, 17953.
- [S6] J. Hafner, *J. Comput. Chem.*, 2008, **29**, 2044.
- [S7] H. J. Monkhorst, J. D. Pack, *Phys. Rev. B: Solid State.*, 1976, **13**, 5188.
- [S8] X. Fan, H. Zhou, X. Guo, *ACS. Nano.*, 2015, **9**, 5125.
- [S9] L. Huo, B. Liu, Z. Gao, J. Zhang, *J. Mater. Chem. A*, 2017, **5**, 18494.
- [S10] Y. Zhou, R. Ma, P. Li, Y. Chen, Q. Liu, G. Cao, J. Wang, *J. Mater. Chem. A*, 2016, **4**, 8204.
- [S11] B. Ren, D. Li, Q. Jin, H. Cui, C. Wang, *J. Mater. Chem. A*, 2017, **5**, 13196.
- [S12] C. Liu, Y. Qiu, Y. Xia, F. Wang, X. Liu, X. Sun, Q. Liang, Z. Chen, *Nanotechnology*, 2017, **28**, 445403.
- [S13] Y. Liu, G. Li, L. Yuan, L. Ge, H. Ding, D. Wang, X. Zou, *Nanoscale*, 2015, **7**, 3130.
- [S14] Y. Wu, H. He, *Materials Letters*, 2017, **209**, 532.
- [S15] H. Li, J. Zou, S. Xie, X. Leng, D. Gao, H. Yang, X. Mao, *Journal of Alloys and Compounds*, 2017, **725**, 884.

- [S16] L. Wu, Z. Pu, Z. Tu, I. S. Amiin, S. Liu, P. Wang, S. Mu, *Chemical Engineering Journal*, 2017, **327**, 705.
- [S17] J. Wang, W. Chen, X. Wang, E. Wang, *Electrochimica Acta*, 2017, **251**, 660.
- [S18] Q. Li, C. Han, X. Ma, D. Wang, Z. Xing, X. Yang, *J. Mater. Chem. A*, 2017, **5**, 17856.
- [S19] X. Zhou, X. Yang, H. Li, M. N. Hedhili, K. W. Huang, L. Li, W. Zhang, *J. Mater. Chem. A*, 2017, **5**, 15552.
- [S20] C. Li, X. Bo, M. Li, L. Guo, *Int J Hydrogen Energ*, 2017, **42**, 15479.
- [S21] Y. Zhao, Q. Tang, B. He, P. Yang, *Int J Hydrogen Energ*, 2017, **42**, 14534.
- [S22] Z. Xing, Q. Liu, A. M. Asiri, X. Sun, *ACS Catal.*, 2015, **5**, 145.
- [S23] S. C. Abbas, J. Wu, Y. Huang, D. D. Babu, G. Anandhababu, M. A. Ghausi, M. Wu, Y. Wang, *Int J Hydrogen Energ*, 2018, **43**, 16.
- [S24] M. Zeng, Y. Chen, J. Li, H. Xue, R. G. Mendes, J. Liu, T. Zhang, M. H. Rummeli, L. Fu, *Nano Energy*, 2017, **33**, 356.
- [S25] H. Fei, Y. Yang, X. Fan, G. Wang, G. Ruan, J. M. Tour, *J. Mater. Chem. A*, 2015, **3**, 5798.
- [S26] Y. Gao, Z. Lang, F. Yu, H. Tan, G. Yan, Y. Wang, Y. Ma, Y. Li, *ChemSusChem*, 2018, **11**, 1082.
- [S27] H. Lin, W. Zhang, Z. Shi, M. Che, X. Yu, Y. Tang, Q. Gao, *ChemSusChem*, 2017, **10**, 2597.
- [S28] H. Lin, Z. Shi, S. He, X. Yu, S. Wang, Q. Gao, Y. Tang, *Chem. Sci.*, 2016, **7**, 3399.
